# Supplementary material
Source: PubMed Central journal article supplement (PMC4679087)
Supplement: supp_the2015-0220_Emmenegger-15-220.pdf [file supp_the2015-0220_Emmenegger-15-220.pdf]

## Overview

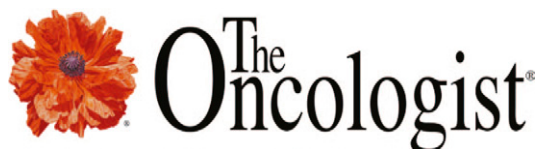

The official journal of the Society for Translational Oncology

**First Published Online November 5, 2015**

**DOI:** 10.1634/theoncologist.2015-0220

**Title:** Temsirolimus Maintenance Therapy After Docetaxel Induction in Castration-Resistant Prostate Cancer

**Authors:** Urban Emmenegger,<sup>a,b</sup> Christopher M. Booth,<sup>c</sup> Scott Berry,<sup>a</sup> Srikala S. Sridhar,<sup>d</sup> Eric Winquist,<sup>e</sup> Nesan Bandali,<sup>a</sup> Annabelle Chow,<sup>b</sup> Christina Lee,<sup>b</sup> Ping Xu,<sup>b</sup> Shan Man,<sup>b</sup> Robert S. Kerbel,<sup>b</sup> Yoo-Joung Ko<sup>a</sup>

<sup>a</sup>Odette Cancer Centre and <sup>b</sup>Sunnybrook Research Institute, Sunnybrook Health Sciences Centre, University of Toronto, Toronto, Ontario, Canada; <sup>c</sup>Queen's University Cancer Research Institute, Kingston, Ontario, Canada; <sup>d</sup>Princess Margaret Cancer Centre, University of Toronto, Toronto, Ontario, Canada; <sup>e</sup>London Health Sciences Centre, London, Ontario, Canada

**Canadian Cancer Trials Identifier:** TEM Prostate (registered with <http://www.canadiancancertrials.ca>)

**Sponsor:** Pfizer (formerly Wyeth)

**Principal Investigators:** Urban Emmenegger, Scott Berry, Robert S. Kerbel, Yoo-Joung Ko

**IRB Approved:** Yes

### Disclosures

**Scott Berry:** Sanofi (H); **Robert S. Kerbel:** Cerulean Pharma, MolMed, Merrimack (C/A), Triphase Accelerator (C/A, RF), Angiocrine Biosciences (C/A, OI), Eli Lilly, Boehringer Ingelheim (C/A, H); **Eric Winquist:** Imclone Systems, Exelixis, Oncogenex, Roche/Genetech (RF). The other authors indicated no financial relationships.

(C/A) Consulting/advisory relationship; (RF) Research funding; (E) Employment; (ET) Expert testimony; (H) Honoraria received; (OI) Ownership interests; (IP) Intellectual property rights/inventor/patent holder; (SAB) Scientific advisory board

## Lessons Learned

Temsirolimus maintenance therapy after docetaxel induction chemotherapy

- is safe in patients with castration-resistant prostate cancer, although biochemical or tumor responses are rare;
- does not diminish quality of life; and
- delays radiological and/or symptomatic progression by approximately 6 months.

## Author Summary: Abstract and Brief Discussion

### Background

No standard therapy is available for men with castration-resistant prostate cancer (CRPC) who have responded to docetaxel and do not yet have disease progression. Hence, we designed a single-arm phase II trial to explore whether the mTOR inhibitor temsirolimus can maintain the response to docetaxel without compromising quality of life.

### Methods

After successful docetaxel induction (75 mg/m<sup>2</sup> every 3 weeks; 6–10 cycles), 21 CRPC patients underwent temsirolimus maintenance treatment (25 mg weekly; 4 weeks per cycle). The primary endpoint was the time to treatment failure (TTTF) (i.e., radiological and/or symptomatic progression). The secondary endpoints included the tumor response rate (RECIST 1.0), safety (National Cancer Institute Common Terminology Criteria for Adverse Events, version 3.0), quality of life (Functional Assessment of Cancer Therapy-Prostate [FACT-P]), pain (Present Pain Intensity [PPI] scale), prostate-specific antigen (PSA) parameters, including time to PSA progression (TPPP) according to Prostate Cancer Clinical Trials Working Group criteria, and serial enumeration of circulating endothelial cells (CECs) and endothelial progenitor cells (CEPs).

## Results

Patients received a median of 7 cycles of temsirolimus (range, 1–28), resulting in a median TTF of 24.3 weeks (95% confidence interval [CI], 16.1–33.0), 1 partial tumor response (4.8%), 1 PSA response (4.8%), and a median TTP of 12.2 weeks (95% CI, 7.8–23.9). Grade 3–4 adverse events were infrequent, and FACT-P and PPI scores remained stable during treatment. CECs did not predict clinical benefit, and CEPs were not consistently detectable.

## Conclusion

Temsirolimus maintenance therapy after successful docetaxel induction is feasible, does not adversely affect quality of life, and, in this exploratory single-arm phase II study, resulted in a median TTF of 24.3 weeks.

## Discussion

In the absence of progression or prohibitive toxicity, docetaxel chemotherapy is usually administered for up to 10 cycles for the treatment of CRPC. However, the optimal duration of docetaxel therapy has not been determined. As opposed to treating to progression or to a finite number of cycles, two different strategies have been explored in preliminary studies: (a) intermittent docetaxel chemotherapy (supplemental online Table 1); and (b) maintenance therapy using various agents (supplemental online Table 2). We present the findings of the first study of temsirolimus maintenance therapy in 21 CRPC patients after successful docetaxel induction. The rapalog mTOR inhibitor (mTORi) temsirolimus was chosen because of the high rate of PI3K-AKT-mTOR pathway abnormalities in CRPC, preclinical temsirolimus activity in various prostate cancer models, and the favorable safety profile of rapalog mTORis.

Temsirolimus maintenance therapy resulted in a median TTF of 24.3 weeks (95% CI, 16.1–33.0) (Fig. 1A; Table 2). Biochemical progression preceded symptomatic (61.9%) and/or radiological (23.8%) progression in most patients, accounting for a TTP of 12.2 weeks (95% CI, 7.8–23.9) (Fig. 1A, 1B; Table 2). Aside from a single PSA and a partial tumor response, we documented any PSA decline in 10 of 20 evaluable patients, and stable disease was observed in 61.9% of patients (Fig. 1C; Table 2). Grade 3 treatment-related side effects such as hyperglycemia were infrequent (9.5%), and one grade 4 thromboembolic event occurred. One patient withdrew consent because of grade 2 peripheral edema, considered “possibly” treatment related. Temsirolimus did not diminish quality of life as assessed using the FACT-P questionnaire (Fig. 2A), nor did we observe significant changes in pain (Fig. 2B) or performance status (data not shown) during treatment.

Our findings confirm the typically cytostatic effects of rapalog mTORis observed in different stages of CRPC (supplemental online Table 3), possibly due to only partial PI3K-AKT-mTOR pathway inhibition and compensatory activation of other signaling pathways. However, considering the acceptable safety profile of temsirolimus, the TTF of 24.3 weeks compares favorably with treatment-free intervals of approximately 4–5 months observed in intermittent chemotherapy trials (supplemental online Table 1). Furthermore, maintenance temsirolimus is superior to ketoconazole or sunitinib, while similar results were achieved with granulocyte macrophage colony-stimulating factor (supplemental online Table 2).

Despite significant changes in the CRPC treatment landscape since the inception of this study in 2008, postdocetaxel maintenance strategies remain relevant. The PI3K-AKT-mTOR pathway contributes to resistance to novel androgen receptor pathway inhibitors such as abiraterone and enzalutamide. However, given the pharmacological shortcomings of rapalog mTORis, future trials might study ATP site mTORis or dual PI3K/mTORis, or select patients with genetic features predicting sustained responses to mTORis.

## Trial Information

|                                   |                                                                                                                                                                                                          |
|-----------------------------------|----------------------------------------------------------------------------------------------------------------------------------------------------------------------------------------------------------|
| <b>Disease</b>                    | Prostate cancer                                                                                                                                                                                          |
| <b>Stage of Disease/Treatment</b> | Metastatic/advanced                                                                                                                                                                                      |
| <b>Previous Therapy</b>           | More than 2 previous regimens                                                                                                                                                                            |
| <b>Type of study - 1</b>          | Phase II                                                                                                                                                                                                 |
| <b>Type of study - 2</b>          | Single arm                                                                                                                                                                                               |
| <b>Primary Endpoint</b>           | Time to treatment failure                                                                                                                                                                                |
| <b>Secondary Endpoints</b>        | Overall response rate<br>Safety<br>Functional Assessment of Cancer Therapy-Prostate (FACT-P)<br>Present Pain Intensity (PPI) index<br>Prostate-specific antigen (PSA) response rate<br>PSA doubling time |

Time to PSA progression (TTPP)  
 Overall survival  
 Analyses of circulating endothelial cells and circulating endothelial progenitor cells

**Additional Details of Endpoints or Study Design**

**Primary endpoint**  
 Time to treatment failure, defined as (a) objective disease progression as per RECIST 1.0 (soft tissue disease) or modified Prostate-Specific Antigen Working Group (bone metastases) criteria (new bone lesions qualifying for progression only if symptomatic; PSA progression only not considered progression); and/or (b) cancer-related symptomatic progression, defined as new or worsening disease-related symptoms requiring the initiation of further therapy for prostate cancer treatment, or a disease-related deterioration in Eastern Cooperative Oncology Group (ECOG) performance status of two levels or higher.

**Secondary endpoints**  
 Overall response rate (RECIST 1.0); safety assessment (National Cancer Institute Common Terminology Criteria for Adverse Events, version 3.0); FACT-P; PPI index; PSA response rate, PSA doubling time, TTPP; overall survival; baseline counts and on-treatment changes of total, viable, and apoptotic circulating endothelial cells and endothelial progenitor cells.

**Investigator’s Analysis**

Active and should be pursued further

**Drug Information**

**Drug 1**

**Generic/Working name**

Temsirolimus

**Trade name**

Torisel

**Company name**

Pfizer (formerly Wyeth)

**Drug type**

Small molecule

**Drug class**

mTOR

**Dose**

25 mg per flat dose

**Route**

IV

**Schedule of Administration**

Temsirolimus 25 mg i.v. weekly, 4-week cycles

**Patient Characteristics**

**Number of patients, male**

21

**Number of patients, female**

0

**Stage**

Metastatic castration-resistant prostate cancer (CRPC) with confirmed PSA response in the absence of any other signs of disease progression after 6–10 cycles of first-line docetaxel chemotherapy (75 mg/m<sup>2</sup> every 3 weeks, 5 mg of prednisone p.o. b.i.d.).

**Age**

Median (range): 67 (51–82)

**Number of previous systemic therapies**

Median (range): 2

**Performance Status: ECOG**

0 — 7  
 1 — 14  
 2 — 0  
 3 — 0  
 Unknown — 0

**Other**

Table 1 provides additional details of the baseline demographic data and clinical characteristics.

**Cancer Types or Histologic Subtypes**

Adenocarcinoma of the prostate without neuroendocrine differentiation 21

## Primary Assessment Method

### Adenocarcinoma of the Prostate Without Neuroendocrine Differentiation

|                                           |                               |
|-------------------------------------------|-------------------------------|
| Number of patients screened               | 32                            |
| Number of patients enrolled               | 21                            |
| Number of patients evaluable for toxicity | 21                            |
| Number of patients evaluated for efficacy | 21                            |
| Evaluation method                         | RECIST 1.0                    |
| Response assessment CR                    | <i>n</i> = 0 (0)              |
| Response assessment PR                    | <i>n</i> = 1 (4.8)            |
| Response assessment SD                    | <i>n</i> = 13 (61.9)          |
| Response assessment PD                    | <i>n</i> = 3 (14.3)           |
| Response assessment OTHER                 | <i>n</i> = 4 (19.0)           |
| (Median) duration assessments TTTF        | 24.3 weeks, 95% CI: 16.1–33.0 |
| Kaplan-Meier time units                   |                               |
| Weeks                                     |                               |

| Time of scheduled assessment and/or time of event | No. with progression | No. censored | Percentage at start of evaluation period | Kaplan-Meier, % | No. at next evaluation/No. at risk |
|---------------------------------------------------|----------------------|--------------|------------------------------------------|-----------------|------------------------------------|
| 2                                                 | 1                    | 0            | 100                                      | 95.24           | 20                                 |
| 6.71                                              | 1                    | 0            | 95.24                                    | 90.48           | 19                                 |
| 9.00                                              | 1                    | 0            | 90.48                                    | 85.71           | 18                                 |
| 11.86                                             | 1                    | 0            | 85.71                                    | 80.95           | 17                                 |
| 12.00                                             | 1                    | 0            | 80.95                                    | 76.19           | 16                                 |
| 15.86                                             | 1                    | 0            | 76.19                                    | 71.43           | 15                                 |
| 16.14                                             | 1                    | 0            | 71.43                                    | 66.67           | 14                                 |
| 18.29                                             | 1                    | 0            | 66.67                                    | 61.90           | 13                                 |
| 19.29                                             | 1                    | 0            | 61.90                                    | 57.14           | 12                                 |
| 24.00                                             | 1                    | 0            | 57.14                                    | 52.38           | 11                                 |
| 24.86                                             | 1                    | 0            | 52.38                                    | 47.62           | 10                                 |
| 26.00                                             | 1                    | 0            | 47.62                                    | 42.86           | 9                                  |
| 30.14                                             | 1                    | 0            | 42.86                                    | 38.10           | 8                                  |
| 31.00                                             | 1                    | 0            | 38.10                                    | 33.33           | 7                                  |
| 31.86                                             | 1                    | 0            | 33.33                                    | 28.57           | 6                                  |
| 33.00                                             | 1                    | 0            | 28.57                                    | 23.81           | 5                                  |
| 39.86                                             | 1                    | 0            | 23.81                                    | 19.05           | 4                                  |
| 64.00                                             | 1                    | 0            | 19.05                                    | 14.29           | 3                                  |
| 80.00                                             | 1                    | 0            | 14.29                                    | 9.52            | 2                                  |
| 95.86                                             | 1                    | 0            | 9.52                                     | 4.76            | 1                                  |
| 110.00                                            | 1                    | 0            | 4.76                                     | 0               | 0                                  |

## Secondary Assessment Method

### Adenocarcinoma of the Prostate Without Neuroendocrine Differentiation

|                                           |      |
|-------------------------------------------|------|
| Number of patients screened               | 32   |
| Number of patients enrolled               | 21   |
| Number of patients evaluable for toxicity | 21   |
| Number of patients evaluated for efficacy | 21   |
| Evaluation method                         | TTPP |

Kaplan-Meier time units  
Weeks

| Time of scheduled assessment and/or time of event | No. with progression | No. censored | Percentage at start of evaluation period | Kaplan-Meier (%) | No. at next evaluation/No. at risk |
|---------------------------------------------------|----------------------|--------------|------------------------------------------|------------------|------------------------------------|
| 2                                                 | 0                    | 1            | 100                                      | 100              | 20                                 |
| 3.86                                              | 1                    | 0            | 100                                      | 95               | 19                                 |
| 4.00                                              | 2                    | 0            | 95                                       | 85               | 17                                 |
| 4.14                                              | 2                    | 0            | 85                                       | 75               | 15                                 |
| 6.71                                              | 0                    | 1            | 75                                       | 75               | 14                                 |
| 7.86                                              | 3                    | 0            | 75                                       | 58.93            | 11                                 |
| 8.29                                              | 1                    | 0            | 58.93                                    | 53.57            | 10                                 |
| 9                                                 | 1                    | 0            | 53.57                                    | 48.21            | 9                                  |
| 12                                                | 1                    | 0            | 48.21                                    | 42.86            | 8                                  |
| 12.14                                             | 1                    | 0            | 42.86                                    | 37.50            | 7                                  |
| 23.43                                             | 1                    | 0            | 37.50                                    | 32.14            | 6                                  |
| 23.86                                             | 1                    | 0            | 32.14                                    | 26.79            | 5                                  |
| 24.00                                             | 1                    | 0            | 26.79                                    | 21.43            | 4                                  |
| 26.86                                             | 1                    | 0            | 21.43                                    | 16.07            | 3                                  |
| 80                                                | 0                    | 1            | 16.07                                    | 16.07            | 2                                  |
| 95.86                                             | 0                    | 1            | 16.07                                    | 16.07            | 1                                  |
| 104                                               | 1                    | 0            | 16.07                                    | 0                | 0                                  |

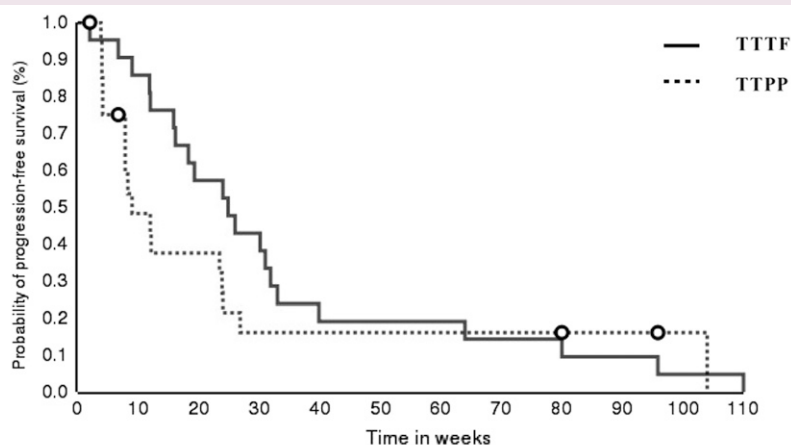

|              |    |    |    |    |    |    |    |    |    |    |    |    |   |   |   |   |   |   |   |   |   |   |
|--------------|----|----|----|----|----|----|----|----|----|----|----|----|---|---|---|---|---|---|---|---|---|---|
| No. at Risk  | 21 | 20 | 19 | 18 | 17 | 16 | 15 | 14 | 13 | 12 | 11 | 10 | 9 | 8 | 7 | 6 | 5 | 4 | 3 | 2 | 1 | 0 |
| No. censored | 0  | 0  | 0  | 0  | 0  | 0  | 0  | 0  | 0  | 0  | 0  | 0  | 0 | 0 | 0 | 0 | 0 | 0 | 0 | 0 | 0 | 0 |
|              | 0  | 1  | 0  | 0  | 0  | 1  | 0  | 0  | 0  | 0  | 0  | 0  | 0 | 0 | 0 | 0 | 0 | 0 | 0 | 1 | 1 | 0 |

Treatment outcomes. **(A)**: The median TTF (i.e., radiological and/or symptomatic progression) was 24.3 weeks (95% confidence interval [CI], 16.1–33), and the TTPP was 12.2 weeks (95% CI, 7.8–23.9).

Abbreviations: TTPP, time to prostate-specific antigen progression; TTF, time to treatment failure.

## Adverse Events

### Adverse Events at All Dose Levels, Cycle 1

| Name             | *NC/NA | Grade |     |    |    |    | All grades |
|------------------|--------|-------|-----|----|----|----|------------|
|                  |        | 1     | 2   | 3  | 4  | 5  |            |
| Bone pain        | 16%    | 23%   | 52% | 9% | 0% | 0% | 84%        |
| Cough            | 44%    | 47%   | 9%  | 0% | 0% | 0% | 56%        |
| Fatigue          | 54%    | 14%   | 28% | 4% | 0% | 0% | 46%        |
| Localized edema  | 58%    | 19%   | 23% | 0% | 0% | 0% | 42%        |
| Anorexia         | 63%    | 19%   | 14% | 4% | 0% | 0% | 37%        |
| Abdominal pain   | 67%    | 19%   | 14% | 0% | 0% | 0% | 33%        |
| Weight loss      | 67%    | 14%   | 19% | 0% | 0% | 0% | 33%        |
| Hyperglycemia    | 72%    | 0%    | 19% | 9% | 0% | 0% | 28%        |
| Cholesterol high | 72%    | 19%   | 9%  | 0% | 0% | 0% | 28%        |
| Constipation     | 77%    | 4%    | 19% | 0% | 0% | 0% | 23%        |
| Hypokalemia      | 82%    | 14%   | 0%  | 4% | 0% | 0% | 18%        |
| Nausea           | 86%    | 14%   | 0%  | 0% | 0% | 0% | 14%        |

Adverse Events Legend

\*No change from baseline/no adverse event.

Summary of adverse events of any grade during temsirolimus therapy reported in >10% of patients or of grade 3 or higher if encountered in >5% of patients.

## Serious Adverse Events

| Name                 | Grade | Attribution |
|----------------------|-------|-------------|
| Biliary obstruction  | 3     | Unlikely    |
| Deep vein thrombosis | 3     | Possible    |
| Pulmonary embolism   | 4     | Possible    |
| Colon cancer         | 4     | Unrelated   |

Four patients presented with serious adverse events. Of note, the case of biliary obstruction was due to prostate cancer progression.

## Assessment, Analysis, and Discussion

|                                            |                                      |
|--------------------------------------------|--------------------------------------|
| <b>Completion</b>                          | Study terminated before completion   |
| <b>Terminated reason</b>                   | Did not fully accrue                 |
| <b>Pharmacokinetics / Pharmacodynamics</b> | Not collected                        |
| <b>Investigator's Assessment</b>           | Active and should be pursued further |

### Discussion

Docetaxel chemotherapy is a major treatment modality of advanced CRPC. However, the optimal duration of docetaxel therapy has not been determined, although it can be associated with severe myelosuppression, neurotoxicity, cumulative asthenia, and other side effects [1]. In the TAX327 trial, CRPC patients received a median of 9.5 cycles of docetaxel (75 mg/m<sup>2</sup> every 3 weeks); 46% of the patients completed 10 cycles, and 38% withdrew from treatment earlier because of progression and 11% because of adverse events [1]. An exploratory analysis of the TAX327 ( $\leq 10$  cycles) versus the CS-205 trial ( $\leq 17$  cycles) suggested a lack of survival benefit with >10 cycles of docetaxel [2, 3]. Thus, in the absence of progression or prohibitive toxicity, in clinical practice, docetaxel is usually administered for  $\leq 10$  cycles.

As opposed to treatment to progression or to a finite number of cycles, two different strategies have been explored in preliminary CRPC studies: (a) intermittent docetaxel chemotherapy, enabling treatment-free intervals of 4–5 months in docetaxel responders (supplemental online Table 1) [4–11]; and (b) maintenance therapy using various agents (supplemental online Table 2) [12–15]. While the definite benefit of intermittent versus continuous docetaxel chemotherapy is being tested in a phase III study (ClinicalTrials.gov identifier NCT01224405), recruitment has been

suspended for a randomized, placebo-controlled phase III trial of orteronel maintenance therapy (a second-generation androgen receptor pathway inhibitor [ARi], the development of which has been terminated [16]) in CRPC patients without disease progression after docetaxel induction ( $\geq 300$  mg/m<sup>2</sup>; ClinicalTrials.gov identifier NCT01707966).

We present the findings of the first prospective study of temsirolimus maintenance therapy in CRPC patients after successful docetaxel induction. Temsirolimus, an mTOR inhibitor (mTORi) of the rapalog family, was chosen because (a) PI3K-AKT-mTOR pathway abnormalities are found almost universally in CRPC [17, 18]; (b) temsirolimus was active in preclinical studies of prostate cancer models with PI3K-AKT-mTOR activation or after docetaxel chemotherapy [19, 20]; and (c) mTORis are thought to impair CRPC progression via numerous complementary mechanisms [21, 22]. Because rapalog mTORis are generally well tolerated, we hypothesized that temsirolimus would maintain the response to docetaxel without compromising quality of life [23–25].

In CRPC patients with a low disease burden after docetaxel induction (median, 6 cycles; range, 6–10; 75 mg/m<sup>2</sup> every 3 weeks), temsirolimus maintenance therapy (median, 7 cycles; range, 1–28; 25 mg weekly, 4 weeks per cycle) resulted in a TTTF of 24.3 weeks (95% CI, 16.1–33.0) (Fig. 1A; Tables 1 and 2). Biochemical progression preceded symptomatic (61.9%) and/or radiological (23.8%) progression in most patients, owing to a relatively short median TTPP of 12.2 weeks (range, 7.8–23.9) (Fig. 1A, B). We observed a  $>50\%$  and an any PSA decline in 1 (5%) and 10 (50%) of 20 evaluable patients, respectively, and a partial response in 1 (4.8%) and stable disease in 13 of 21 patients (61.9%) (Fig. 1C; Table 1). Despite rarely sustained PSA control, we found significant correlations between the best PSA response and TTTF, and between TTPP and TTTF (supplemental online Fig. 1). The median overall survival of our selected group of docetaxel responders was 10 months longer than in the TAX327 study (125.1 weeks, 95% CI: 97.7 not reached) (supplemental online Fig. 2).

Temsirolimus was well tolerated, with rare grade 3 treatment-related side effects such as hyperglycemia (9.5%) and a single grade 4 thromboembolic event, and without new safety signals. One patient withdrew consent because of grade 2 peripheral edema. Temsirolimus therapy did not diminish quality of life (FACT-P questionnaire; Fig. 2A). During temsirolimus therapy, we also found no significant increases in the median PPI (Fig. 2B) or decreases in the performance status (ECOG; data not shown).

Our findings confirm the usually cytostatic effects of temsirolimus and other rapalog mTORis observed in different CRPC stages (supplemental online Table 3) [26–32]. In published series, stable disease was the best objective response in most patients, and the typically short-lived PSA declines were restricted to less than one third of patients; confirmed PSA responses were rare. Indeed, rapalog mTORis only partially block the PI3K-AKT-mTOR pathway [33]. Furthermore, mTOR inhibition activates compensatory pathways (e.g., AR and mitogen-activated protein kinase pathways) [34, 35]. In particular, compensatory AR activation might explain the low PSA response rates and short TTPP seen with mTORi monotherapy.

Considering the differences in trial design, temsirolimus appears to be superior to maintenance treatment with either ketoconazole or sunitinib in terms of efficacy (supplemental online Table 2) [14, 15] and provides a similar benefit as GM-CSF [13]. However, given the lack of a direct comparison, such conclusions must be viewed with caution. In contrast, consolidation therapy with six doses of weekly docetaxel (20 mg/m<sup>2</sup>) and samarium-153-EDTMP after four cycles of docetaxel (70 mg/m<sup>2</sup>) and estramustine provided a median PSA and clinical progression-free survival of 6.4 and 15 months, respectively [12].

Considering the acceptable temsirolimus side effect profile, the median TTTF of 24.3 weeks in our patients compares favorably with treatment-free intervals of 4–5 months observed in intermittent chemotherapy trials (supplemental online Table 1) [4–11]. Of note, a docetaxel rechallenge was usually triggered by PSA, rather than symptomatic or radiologic progression in the intermittent chemotherapy trials. However, in our study, we purposely focused on clinical and/or radiological progression to define treatment failure.

Given the strong antivasular effects of mTORis [22], we attempted to study the predictive potential of circulating endothelial cells (CECs) and endothelial progenitor cells (CEPs) in our patients [36]. The baseline enumeration of total, viable, and apoptotic CECs did not predict the outcome, and very low CEP counts were detectable in a few patients only (data not shown), potentially because of the low baseline tumor burden (supplemental online Fig. 3).

The CRPC treatment landscape has significantly changed since the inception of this study in 2008 [37]. However, because many future patients will have acquired resistance to second-generation ARis such as abiraterone and enzalutamide before undergoing docetaxel chemotherapy, postdocetaxel maintenance strategies remain relevant. Intriguingly, the PI3K-AKT-mTOR pathway contributes to resistance to ARis [38–40]. Thus, patients with previous ARi exposure might be particularly sensitive to

mTORis. Alternatively, concurrent mTORis might help delay resistance to ARis, similar to successful combinations of mTORis with estrogen receptor pathway inhibitors in breast cancer [41, 42]. Because of the pharmacological shortcomings of rapalog mTORis, future studies might be pursued by using ATP-site mTORis or dual PI3K/mTOR inhibitors, or by using mTORis only in patients with genetic features predicting a high rate of sustained responses [40, 43].

## Acknowledgments

Urban Emmenegger expresses his gratitude to J. Bogaerts (Brussels, Belgium), P. Schöffski (Leuven, Belgium), and S.M. Swain (Washington, DC, USA) for their support with the protocol development during the Ninth FECS-AACR-ASCO workshop “Methods in Clinical Cancer Research” 2007, Flims, Switzerland. Dr. Emmenegger was supported by the Joseph and Silvana Cancer Research Fund.

## References

1. Tannock IF, de Wit R, Berry WR et al. Docetaxel plus prednisone or mitoxantrone plus prednisone for advanced prostate cancer. *N Engl J Med* 2004;351:1502–1512.
2. Pond GR, Armstrong AJ, Wood BA et al. Evaluating the value of number of cycles of docetaxel and prednisone in men with metastatic castration-resistant prostate cancer. *Eur Urol* 2012;61:363–369.
3. Sonpavde G, Matveev V, Burke JM et al. Randomized phase II trial of docetaxel plus prednisone in combination with placebo or AT-101, an oral small molecule Bcl-2 family antagonist, as first-line therapy for metastatic castration-resistant prostate cancer. *Ann Oncol* 2012;23:1803–1808.
4. Beer TM, Garzotto M, Henner WD et al. Intermittent chemotherapy in metastatic androgen-independent prostate cancer. *Br J Cancer* 2003;89:968–970.
5. Beer TM, Garzotto M, Henner WD et al. Multiple cycles of intermittent chemotherapy in metastatic androgen-independent prostate cancer. *Br J Cancer* 2004;91:1425–1427.
6. Beer TM, Ryan CW, Venner PM et al. Intermittent chemotherapy in patients with metastatic androgen-independent prostate cancer: Results from ASCENT, a double-blinded, randomized comparison of high-dose calcitriol plus docetaxel with placebo plus docetaxel. *Cancer* 2008;112:326–330.
7. Olbert PJ, Weil C, Hegele A et al. [Toxicity and efficacy of intermittent docetaxel chemotherapy for hormone refractory prostate cancer]. *Aktuelle Urol* 2009;40:164–168.
8. Soga N, Kato M, Nishikawa K et al. Intermittent docetaxel therapy with estramustine for hormone-refractory prostate cancer in Japanese patients. *Int J Clin Oncol* 2009;14:130–135.
9. Mountzios I, Bournakis E, Efstathiou E et al. Intermittent docetaxel chemotherapy in patients with castrate-resistant prostate cancer. *Urology* 2011;77:682–687.
10. Narita S, Tsuchiya N, Yuasa T et al. Outcome, clinical prognostic factors and genetic predictors of adverse reactions of intermittent combination chemotherapy with docetaxel, estramustine phosphate and carboplatin for castration-resistant prostate cancer. *Int J Clin Oncol* 2012;17:204–211.
11. Li YF, Zhang SF, Zhang TT et al. Intermittent tri-weekly docetaxel plus bicalutamide in patients with castration-resistant prostate cancer: A single-arm prospective study using a historical control for comparison. *Asian J Androl* 2013;15:773–779.
12. Fizazi K, Beuzebec P, Lombroso J et al. Phase II trial of consolidation docetaxel and samarium-153 in patients with bone metastases from castration-resistant prostate cancer. *J Clin Oncol* 2009;27:2429–2435.
13. Nabhan C, Meyer A, Tolzien K et al. A phase II pilot trial investigating the efficacy and activity of single agent granulocyte macrophage colony-stimulating factor as maintenance approach in castration-resistant prostate cancer patients responding to chemotherapy. *Avicenna J Med* 2011;1:12–17.
14. Gil-Bazo I, Arévalo E, Castillo A et al. Safety and efficacy of maintenance therapy with a nonspecific cytochrome P17 inhibitor (CYP17i) after response/stabilization to docetaxel in metastatic castration-resistant prostate cancer. *Clin Genitourin Cancer* 2013;11:78–84.
15. Fuereder T, Wachek V, Strommer S et al. Circulating endothelial progenitor cells in castration resistant prostate cancer: A randomized, controlled, biomarker study. *PLoS One* 2014;9:e95310.
16. Morris MJ. Failure of ELM-PC 5: An ineffective drug or an unfit end point? *J Clin Oncol* 2015;33:679–681.
17. Taylor BS, Schultz N, Hieronymus H et al. Integrative genomic profiling of human prostate cancer. *Cancer Cell* 2010;18:11–22.
18. Edlind MP, Hsieh AC. PI3K-AKT-mTOR signaling in prostate cancer progression and androgen deprivation therapy resistance. *Asian J Androl* 2014;16:378–386.
19. Neshat MS, Mellinghoff IK, Tran C et al. Enhanced sensitivity of PTEN-deficient tumors to inhibition of FRAP/mTOR. *Proc Natl Acad Sci USA* 2001;98:10314–10319.
20. Wu L, Birl DC, Tannock IF. Effects of the mammalian target of rapamycin inhibitor CCI-779 used alone or with chemotherapy on human prostate cancer cells and xenografts. *Cancer Res* 2005;65:2825–2831.
21. Bertoldo F, Silvestris F, Ibrahim T et al. Targeting bone metastatic cancer: Role of the mTOR pathway. *Biochim Biophys Acta* 2014;1845:248–254.
22. Seeliger H, Guba M, Kleespies A et al. Role of mTOR in solid tumor systems: A therapeutical target against primary tumor growth, metastases, and angiogenesis. *Cancer Metastasis Rev* 2007;26:611–621.



23. Pritchard KI, Burris HA III, Ito Y et al. Safety and efficacy of everolimus with exemestane vs. exemestane alone in elderly patients with HER2-negative, hormone receptor-positive breast cancer in BOLERO-2. *Clin Breast Cancer* 2013;13:421.8–432.e8.
24. Wolff AC, Lazar AA, Bondarenko I et al. Randomized phase III placebo-controlled trial of letrozole plus oral temsirolimus as first-line endocrine therapy in postmenopausal women with locally advanced or metastatic breast cancer. *J Clin Oncol* 2013;31:195–202.
25. Hudes G, Carducci M, Tomczak P et al. Temsirolimus, interferon alfa, or both for advanced renal-cell carcinoma. *N Engl J Med* 2007;356:2271–2281.
26. Armstrong AJ, Shen T, Halabi S et al. A phase II trial of temsirolimus in men with castration-resistant metastatic prostate cancer. *Clin Genitourin Cancer* 2013;11:397–406.
27. Kruczek K, Ratterman M, Tolzien K et al. A phase II study evaluating the toxicity and efficacy of single-agent temsirolimus in chemotherapy-naïve castration-resistant prostate cancer. *Br J Cancer* 2013;109:1711–1716.
28. Nakabayashi M, Werner L, Courtney KD et al. Phase II trial of RAD001 and bicalutamide for castration-resistant prostate cancer. *BJU Int* 2012;110:1729–1735.
29. Templeton AJ, Dutoit V, Cathomas R et al. Phase 2 trial of single-agent everolimus in chemotherapy-naïve patients with castration-resistant prostate cancer (SAKK 08/08). *Eur Urol* 2013;64:150–158.
30. Amato RJ, Wilding G, Bublely G et al. Safety and preliminary efficacy analysis of the mTOR inhibitor ridaforolimus in patients with taxane-treated, castration-resistant prostate cancer. *Clin Genitourin Cancer* 2012;10:232–238.
31. Meulenbeld HJ, de Bono JS, Tagawa ST et al. Tolerability, safety and pharmacokinetics of ridaforolimus in combination with bicalutamide in patients with asymptomatic, metastatic castration-resistant prostate cancer (CRPC). *Cancer Chemother Pharmacol* 2013;72:909–916.
32. Armstrong AJ, Netto GJ, Rudek MA et al. A pharmacodynamic study of rapamycin in men with intermediate- to high-risk localized prostate cancer. *Clin Cancer Res* 2010;16:3057–3066.
33. Hidalgo M. From node to pathway blockade: Lessons learned from targeting mammalian target of rapamycin. *J Clin Oncol* 2012;30:85–87.
34. Carracedo A, Ma L, Teruya-Feldstein J et al. Inhibition of mTORC1 leads to MAPK pathway activation through a PI3K-dependent feedback loop in human cancer. *J Clin Invest* 2008;118:3065–3074.
35. Carver BS, Chapinski C, Wongvipat J et al. Reciprocal feedback regulation of PI3K and androgen receptor signaling in PTEN-deficient prostate cancer. *Cancer Cell* 2011;19:575–586.
36. Shaked Y, Henke E, Roodhart JM et al. Rapid chemotherapy-induced acute endothelial progenitor cell mobilization: Implications for antiangiogenic drugs as chemosensitizing agents. *Cancer Cell* 2008;14:263–273.
37. Basch E, Loblaw DA, Oliver TK et al. Systemic therapy in men with metastatic castration-resistant prostate cancer: American Society of Clinical Oncology and Cancer Care Ontario clinical practice guideline. *J Clin Oncol* 2014;32:3436–3448.
38. Thadani-Mulero M, Portella L, Sun S et al. Androgen receptor splice variants determine taxane sensitivity in prostate cancer. *Cancer Res* 2014;74:2270–2282.
39. Conteduca V, Aieta M, Amadori D et al. Neuroendocrine differentiation in prostate cancer: Current and emerging therapy strategies. *Crit Rev Oncol Hematol* 2014;92:11–24.
40. Iyer G, Hanrahan AJ, Milowsky MI et al. Genome sequencing identifies a basis for everolimus sensitivity. *Science* 2012;338:221.
41. Schayowitz A, Sabnis G, Goloubeva O et al. Prolonging hormone sensitivity in prostate cancer xenografts through dual inhibition of AR and mTOR. *Br J Cancer* 2010;103:1001–1007.
42. Dees EC, Carey LA. Improving endocrine therapy for breast cancer: It's not that simple. *J Clin Oncol* 2013;31:171–173.
43. Fruman DA, Rommel C. PI3K and cancer: Lessons, challenges and opportunities. *Nat Rev Drug Discov* 2014;13:140–156.
44. Cella D, Nichol MB, Eton D et al. Estimating clinically meaningful changes for the Functional Assessment of Cancer Therapy-Prostate: Results from a clinical trial of patients with metastatic hormone-refractory prostate cancer. *Value Health* 2009;12:124–129.

# Figures and Tables

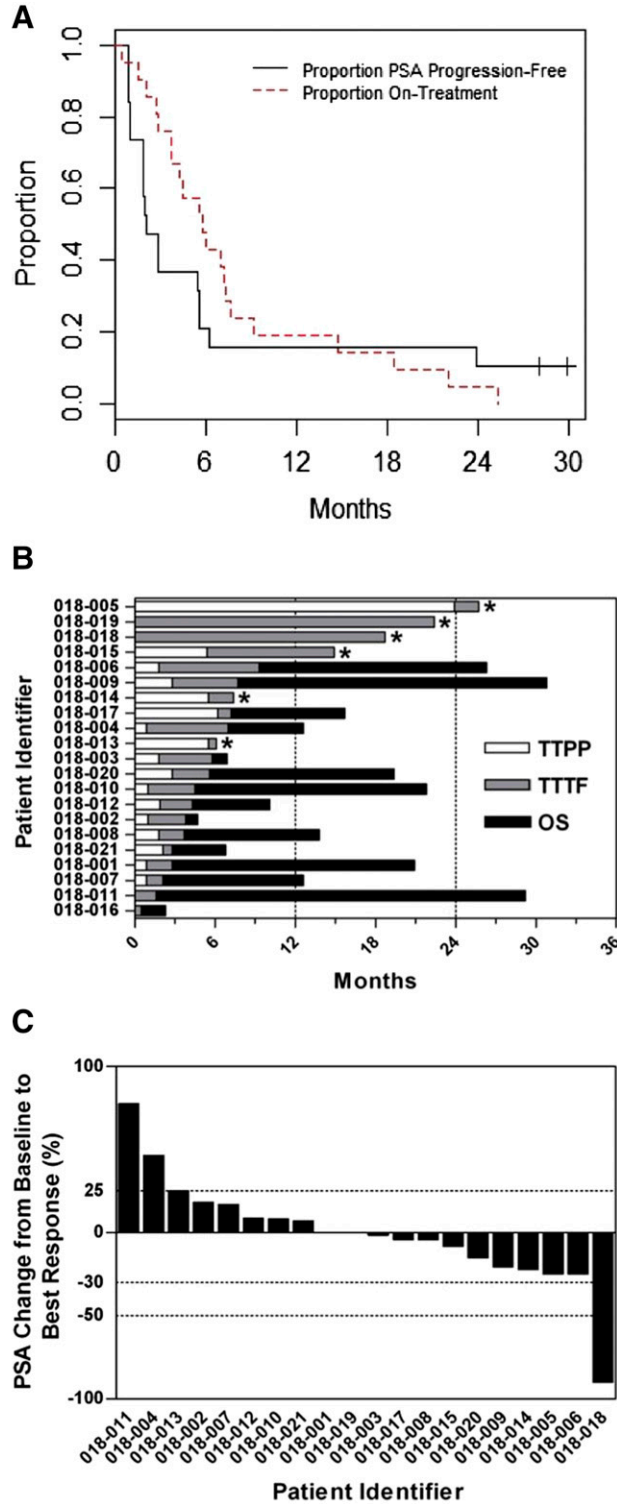

**Figure 1.** Treatment outcomes. **(A):** The median TTTF (i.e., radiological and/or symptomatic progression) was 24.3 weeks (95% CI, 16.1–33.0). The TTPP was 12.2 weeks (95% CI, 7.8–23.9). **(B):** Depiction of TTPP (white bars), TTTF (gray bars), and OS (black bars) in individual patients ranked according to TTTF. Asterisks indicate patients alive at study termination. **(C):** Waterfall plot of percentage of PSA changes from baseline to best response of 20 evaluable patients, revealing a PSA response >50% in 1 patient and any PSA decline in 10 patients.

Abbreviations: OS, overall survival; PSA, prostate-specific antigen; TTPP, time to PSA progression; TTTF, time to treatment failure.

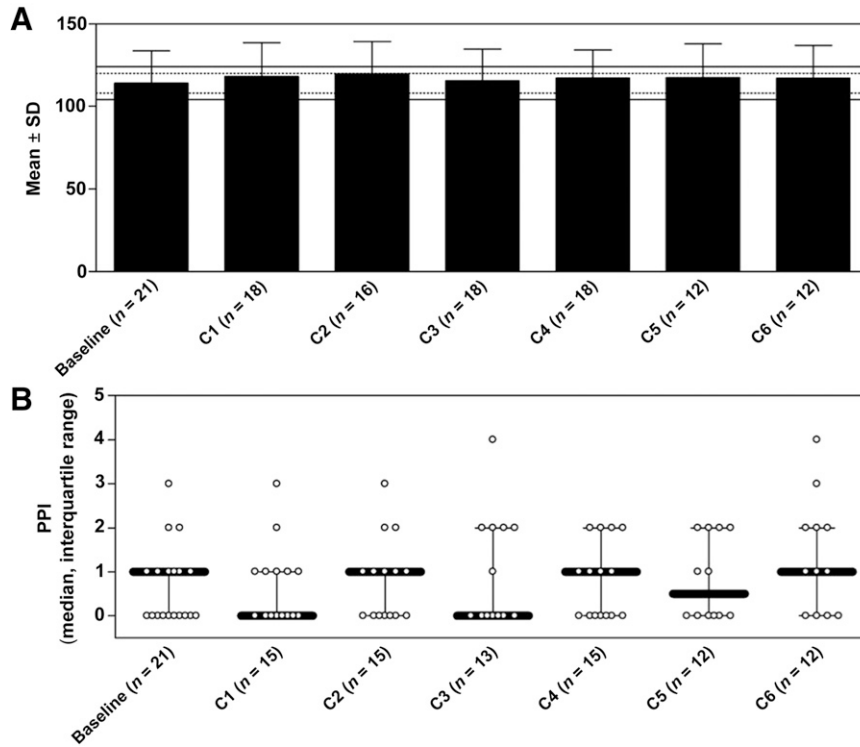

**Figure 2.** Quality of life and pain assessment during temsirolimus maintenance therapy. **(A):** Functional Assessment of Cancer Therapy-Prostate (FACT-P) scores were obtained at baseline and on day 1 of each treatment cycle thereafter. Compared with the mean  $\pm$  SD FACT-P total score at baseline of  $114 \pm 19.5$ , no clinically meaningful changes were observed during temsirolimus maintenance therapy, using either more (broken lines) or less (continuous line) conservative minimally important difference ranges, as described by Cella et al. [44]. Also, no significant changes were seen in the FACT-P subscores (data not shown). **(B):** The median PPI score at baseline was 1 (range, 0–3) and did not significantly change during temsirolimus maintenance therapy. Abbreviations: C, cycle; PPI, Present Pain Intensity.

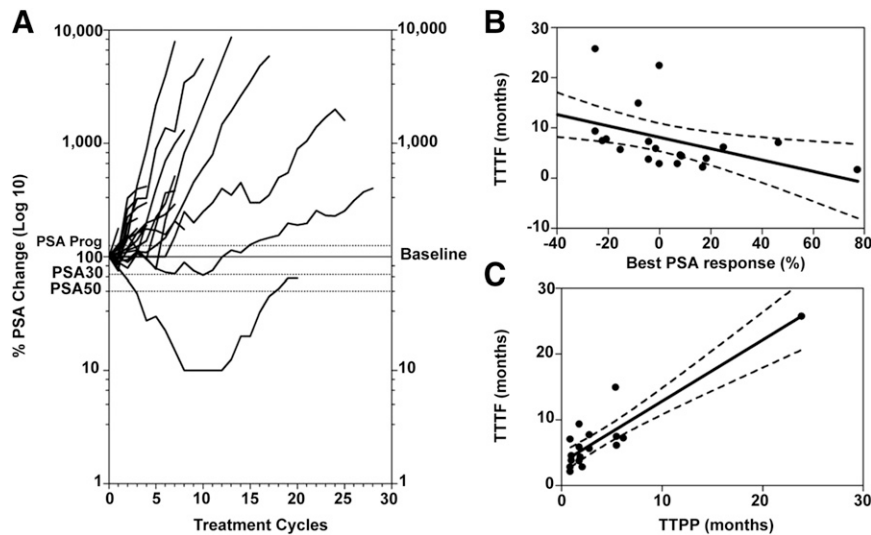

**Supplemental Figure 1.** Correlation of PSA parameters with time to treatment failure. **(A):** Relative PSA changes of individual patients during temsirolimus maintenance therapy. **(B, C):** TTTF correlated with the best PSA response achieved ( $p = .0147$ ) **(B)** and with the time to PSA progression (TTPP;  $p < .0001$ ) **(C)**.

Abbreviations: Prog, progression; PSA, prostate-specific antigen; TTTF, time to treatment failure.

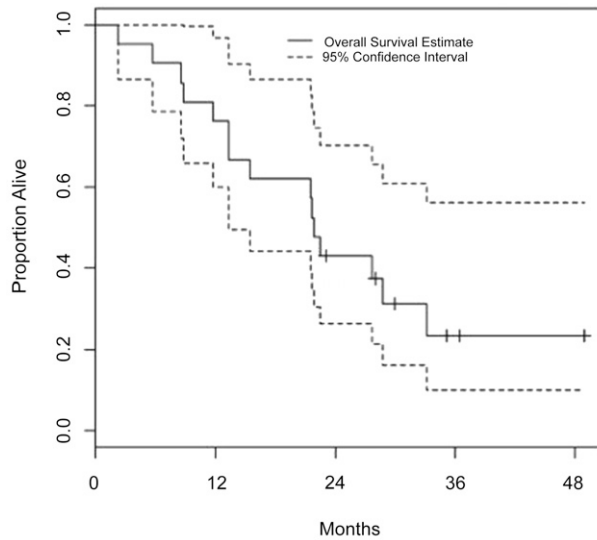

**Supplemental Figure 2.** Overall survival analysis. The median overall survival of the study participants was 28.8 months (95% confidence interval, 22.5 - not reached).

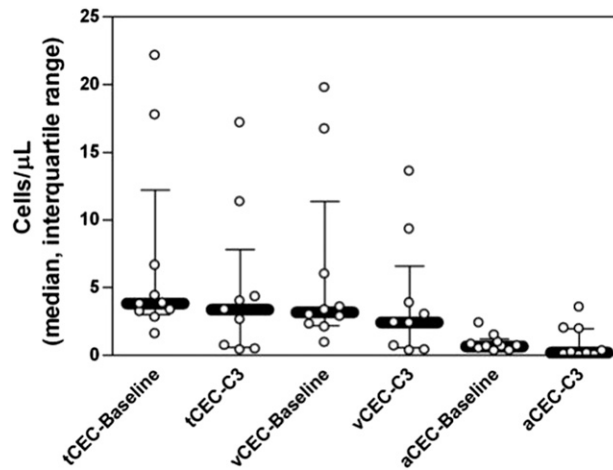

**Supplemental Figure 3.** Analyses of circulating endothelial cells and circulating endothelial progenitor cells. Ten patients underwent serial analyses of circulating endothelial cells (CECs) and circulating endothelial progenitor cells (CEPs) according to the method detailed by Shaked et al. [36]. There were no significant changes in tCEC, vCEC, or aCEC counts when comparing baseline values with enumerations after 3 cycles of temsirolimus. In addition, individual CEC counts did not correlate with other outcome parameters such as time to treatment failure (data not shown). Very low levels of CEPs were detectable in a small subgroup of patients only, precluding statistical analyses.

Abbreviations: aCEC, apoptotic circulating endothelial cells; tCEC, total circulating endothelial cells; vCEC, viable circulating endothelial cells.

**Table 1.** Baseline demographic data and clinical characteristics

| <b>Characteristic</b>                                             | <b>Value</b>   |
|-------------------------------------------------------------------|----------------|
| Race                                                              |                |
| White                                                             | 16             |
| Asian                                                             | 3              |
| Black                                                             | 1              |
| Native American                                                   | 1              |
| Age (yr)                                                          |                |
| Mean $\pm$ SD                                                     | 68 $\pm$ 7.69  |
| Median                                                            | 67             |
| Range                                                             | 51–82          |
| Gleason score <sup>a</sup>                                        |                |
| $\leq 6$                                                          | 3              |
| 7                                                                 | 6              |
| $\geq 8$                                                          | 10             |
| Primary local therapy                                             |                |
| Radiation                                                         | 13             |
| Prostatectomy                                                     | 4              |
| Prostatectomy and radiation                                       | 4              |
| No. of lines of systemic therapy preceding docetaxel <sup>b</sup> |                |
| None                                                              | 1              |
| 1 Line                                                            | 7              |
| 2 Lines                                                           | 10             |
| 3 Lines                                                           | 2              |
| 4 Lines                                                           | 1              |
| Type of systemic therapies preceding docetaxel                    |                |
| Bicalutamide                                                      | 20             |
| Ketoconazole/hydrocortisone                                       | 7              |
| Prednisone                                                        | 3              |
| Other                                                             | 8              |
| No. of docetaxel cycles                                           |                |
| 6                                                                 | 10             |
| 7                                                                 | 2              |
| 8                                                                 | 8              |
| 9                                                                 | 0              |
| 10                                                                | 1              |
| Metastatic sites                                                  |                |
| Bones                                                             | 18             |
| Nodes                                                             | 10             |
| Lung                                                              | 6              |
| Liver                                                             | 3              |
| PSA ( $\mu\text{g/L}$ )                                           |                |
| Mean $\pm$ SD                                                     | 50 $\pm$ 92.65 |
| Median                                                            | 17.3           |
| Range                                                             | 0.02–380.7     |

|                                           |                     |
|-------------------------------------------|---------------------|
| Lactate dehydrogenase (U/L)               |                     |
| Mean $\pm$ SD                             | 227.76 $\pm$ 61.45  |
| Median                                    | 197                 |
| Range                                     | 109–353             |
| Alkaline phosphatase (IU/L)               |                     |
| Mean $\pm$ SD                             | 154.10 $\pm$ 148.64 |
| Median                                    | 82                  |
| Range                                     | 44–565              |
| Albumin (g/L)                             |                     |
| Mean $\pm$ SD                             | 39.90 $\pm$ 4.45    |
| Median                                    | 40                  |
| Range                                     | 31–47               |
| Hemoglobin (g/L)                          |                     |
| Mean $\pm$ SD                             | 118.40 $\pm$ 11.71  |
| Median                                    | 118                 |
| Range                                     | 100–149             |
| Present Pain Intensity score <sup>c</sup> |                     |
| 0                                         | 10                  |
| 1                                         | 7                   |
| 2                                         | 2                   |
| 3                                         | 1                   |
| ECOG performance status                   |                     |
| 0                                         | 7                   |
| 1                                         | 14                  |
| FACT-P total score                        |                     |
| Mean                                      | 114.0               |
| SD                                        | 19.5                |

Data presented as *n*, unless otherwise noted.

<sup>a</sup>Not available for 2 patients.

<sup>b</sup>Excluding androgen deprivation therapy.

<sup>c</sup>Available for 20 patients.

Abbreviations: ECOG, Eastern Cooperative Oncology Group; FACT-P, Functional Assessment of Cancer Therapy-Prostate; PSA, prostate-specific antigen.

**Table 2.** Treatment information and efficacy

| Variable                       | Value          |
|--------------------------------|----------------|
| Total cycles                   |                |
| Median                         | 7              |
| Range                          | 1–28           |
| Total temsirolimus dose (mg)   |                |
| Median                         | 545            |
| Range                          | 50–2,750       |
| Time to treatment failure (wk) |                |
| Median                         | 24.3           |
| 95% CI                         | 16.1–33.0      |
| Maximum PSA reduction (%)      |                |
| Median                         | 0              |
| Range                          | –90.0 to +18.4 |

|                                            |            |
|--------------------------------------------|------------|
| Time to PSA progression (wk)               |            |
| Median                                     | 12.2       |
| 95% CI                                     | 7.8–23.9   |
| PSA doubling time (wk)                     |            |
| Median                                     | 10.9       |
| Range                                      | 4.3–204.1  |
| Overall survival (wk)                      |            |
| Median                                     | 125.1      |
| 95% CI                                     | 97.7–NR    |
| Best objective response                    |            |
| PR                                         | 1 (4.8%)   |
| SD                                         | 13 (61.9%) |
| PD                                         | 3 (14.3%)  |
| Nonevaluable                               | 4 (19.0%)  |
| Reasons for treatment failure <sup>a</sup> |            |
| Symptomatic progression                    | 13 (61.9%) |
| Radiological progression                   | 5 (23.8%)  |
| Toxicity                                   | 1 (4.8%)   |
| Intercurrent illness                       | 1 (4.8%)   |
| Patient withdrawal                         | 1 (4.8%)   |
| Investigator discretion                    | 1 (4.8%)   |

---

Data are presented as *n* (%), unless otherwise noted.

<sup>a</sup>Multiple counting allowed.

Abbreviations: CI, confidence interval; NR, not reached; PD, progressive disease; PR, partial response; SD, stable disease.

**Supplemental Table 1.** Intermittent docetaxel chemotherapy for castration-resistant prostate cancer

| Reference                     | Study type                                    | n                    | Treatment details                                                                                                                                            | Trigger for treatment interruption                              | PSA50 | Percentage reaching first treatment-free interval                                   | Duration of first treatment-free interval                          | Trigger for docetaxel rechallenge                                                  |
|-------------------------------|-----------------------------------------------|----------------------|--------------------------------------------------------------------------------------------------------------------------------------------------------------|-----------------------------------------------------------------|-------|-------------------------------------------------------------------------------------|--------------------------------------------------------------------|------------------------------------------------------------------------------------|
| Beer et al. 2003, 2004 [4, 5] | Single-arm phase II (substudy)                | 8 of 37 patients     | Weekly DOC (36 mg/m <sup>2</sup> ; day 2) + weekly calcitriol (0.5 mg/kg, day 1), median treatment duration 45 weeks                                         | Confirmed PSA50 and PSA <4 ng/mL                                | 29.7% | 21.6                                                                                | Median, 20 weeks (range, 13–74)                                    | Confirmed 50% PSA increase, and PSA >1 ng/mL                                       |
| Beer et al. 2008 [6]          | Randomized phase II                           | 250, 1:1 randomized  | DOC plus C (0.5 mg/kg, day 1) vs. DOC plus P                                                                                                                 | Confirmed PSA50 and PSA <4 ng/mL                                | N/A   | 18 overall (C 20 vs. P 16)                                                          | Median, 18 weeks (range, 4–70) overall (C 20 weeks vs. P 16 weeks) | Confirmed 50% PSA increase, and PSA >2 ng/mL                                       |
| Olbert et al. 2009 [7]        | Chart review                                  | 46                   | Variable DOC regimens (mostly weekly) ± EMP or mitoxantrone, 12-week treatment                                                                               | Predefined 12 weeks of treatment                                | 56%   | NR                                                                                  | Not specified (≥ 3 months)                                         | At least ≥3 months off DOC                                                         |
| Soga et al. 2009 [8]          | Phase II                                      | 15                   | DOC 70 mg/m <sup>2</sup> q3 weeks plus EMP 560 mg p.o. o.d. days 1–5                                                                                         | At least 3 cycles of treatment and CR, PR or SD                 | NR    | 80 (9 pts after 3 cycles, 3 after 6 cycles)                                         | NR                                                                 | NR                                                                                 |
| Mountzios et al. 2011 [9]     | Chart review                                  | 35                   | DOC 45 mg/m <sup>2</sup> biweekly, plus prednisone 5 mg b.i.d. (continued during DOC-free interval)                                                          | Confirmed PSA50 in the absence of progression                   | 51.4% | 51.4 (after a median of 6 infusions, mean time to first interval 2.9 ± 0.98 months) | Median, 4.5 months (range, 1–16)                                   | Confirmed 25% PSA increase above nadir and PSA >10 ng/mL, or objective progression |
| Narita et al. 2012 [10]       | Phase II                                      | 35                   | DOC 60 mg/m <sup>2</sup> day 1, carboplatin AUC5 day 1, EMP 560 mg p.o. daily (28-day cycles)                                                                | 2 cycles                                                        | 45.7% | 40                                                                                  | NR                                                                 | PSA above nadir                                                                    |
| Li et al. 2013 [11]           | Phase II (arm A), plus matching control arm B | Arm A: 42; arm B: 60 | A: intermittent DOC 75 mg/m <sup>2</sup> q3 weeks plus bicalutamide; B: continued docetaxel 75 mg/m <sup>2</sup> q3 weeks without bicalutamide, 10–12 cycles | Confirmed PSA50, stable radiological findings, ≥3 cycles of DOC | 66.7% | 66.7                                                                                | Median, 5.3 months (range, 2–20)                                   | PSA increase ≥25%                                                                  |

Abbreviations: C, Calcitriol; DOC, docetaxel; EMP estramustine phosphate; NR, not reported; P, placebo; PSA, prostate-specific antigen; PSA50, >50% PSA response; q3, every 3.



**Supplemental Table 2.** Maintenance therapy

| Reference                 | Study type                    | Patient population                                                                                                                                   | n                                                                                                                                                 | Maintenance treatment details                                                  | Trigger for maintenance therapy                                                                                                                                                                                                                   | Results                                                                                                                                                                                                              |
|---------------------------|-------------------------------|------------------------------------------------------------------------------------------------------------------------------------------------------|---------------------------------------------------------------------------------------------------------------------------------------------------|--------------------------------------------------------------------------------|---------------------------------------------------------------------------------------------------------------------------------------------------------------------------------------------------------------------------------------------------|----------------------------------------------------------------------------------------------------------------------------------------------------------------------------------------------------------------------|
| Fizazi et al. 2009 [12]   | Phase II, single-arm          | Bone metastatic CPRC (after docetaxel at 70 mg/m <sup>2</sup> q3 weeks, plus EMP 10 mg/kg/d1-5 q3 weeks)                                             | 43                                                                                                                                                | Docetaxel 20 mg/m <sup>2</sup> weekly × 6 plus Samarium-153-EDTMP (37 MBq/kg)  | Response or SD after 4 treatment cycles, 42 pts entered maintenance phase of study                                                                                                                                                                | Primary endpoint PSA PFS: 6.4 months (95% CI 6-7 months); clinical PFS 15 months (11-29); PSA RR 77%; pain RR 60%                                                                                                    |
| Nabhan et al. 2011 [13]   | Phase II, single-arm          | CRPC, after maximized docetaxel or mitoxantrone induction chemotherapy (details of regimens not provided)                                            | 15 evaluable for toxicity, 13 for efficacy                                                                                                        | GM-CSF 250 µg/m <sup>2</sup> s.c. o.d. × 14 days (28 day cycles)               | (A) ≥8 cycles, no signs of progression, and no wish to continue chemotherapy, or (B) <8 cycles but PSA drop ≤10% on two consecutive measurements and no signs of radiological progression, or (C) no progression 12 weeks after last chemotherapy | PSA response 15.3%; SD 30.7%; median time to PSA progression 6 months (4-12); radiological SD 69.2%; median time to radiological progression 6 months (2-10); median time to any type of progression 6 months (2-12) |
| Gil-Bazo et al. 2013 [14] | Chart review                  | CRPC, median of 7 cycles (range, 3-12) of docetaxel (75 mg/m <sup>2</sup> q3 weeks)                                                                  | 20 without progression evaluated (of 38 overall), 10 treated with maintenance low-dose ketoconazole, 10 without maintenance low-dose ketoconazole | Ketoconazole 200 mg p.o. t.i.d.                                                | Biochemical response or stabilization to docetaxel in the absence of radiologic or bone scan progression                                                                                                                                          | Median TTP from start of chemotherapy 11.5 months (6.3 - 16.6) with low-dose ketoconazole, 9.2 months (8.5 - 9.9) without low-dose ketoconazole, p = .47                                                             |
| Fuereder et al. 2014 [15] | Phase II, two-arm, randomized | CRPC, after induction therapy with docetaxel (75 mg/m <sup>2</sup> q3 weeks; n = 3) and sunitinib (37.5 mg/day p.o., 2 weeks on - 1 week off; n = 8) | 8                                                                                                                                                 | Sunitinib 50 mg/day p.o., 2 weeks on - 1 week off, or no maintenance treatment | 50% PSA response with no objective progression                                                                                                                                                                                                    | PSA and/or objective PFS 2.6 months (1.4-2.9) with sunitinib maintenance versus 2.1 months (1.8-3.5) without sunitinib maintenance                                                                                   |

Abbreviations: CRPC, castration-resistant prostate cancer; 95% CI, 95% confidence interval; EMP, estramustine phosphate; GM-CSF, granulocyte-macrophage colony stimulating factor; PFS, progression-free survival; PSA, prostate-specific antigen; q3, every 3; RR, response rate; SD, stable disease; TTP, time to progression.

**Supplemental Table 3.** mTOR inhibitor CRPC studies

| Reference                    | Type of study                   | n                              | Patients                                                                                                                                                                                         | Treatment                                                                                                                                           | Primary endpoint                                                                                                                       | Other results                                                                                                                                                                                            | Side effects                                                                                                                                                                                                                                                                                         | Comments                                                                                                      |
|------------------------------|---------------------------------|--------------------------------|--------------------------------------------------------------------------------------------------------------------------------------------------------------------------------------------------|-----------------------------------------------------------------------------------------------------------------------------------------------------|----------------------------------------------------------------------------------------------------------------------------------------|----------------------------------------------------------------------------------------------------------------------------------------------------------------------------------------------------------|------------------------------------------------------------------------------------------------------------------------------------------------------------------------------------------------------------------------------------------------------------------------------------------------------|---------------------------------------------------------------------------------------------------------------|
| Armstrong et al. 2013 [26]   | Open-label, single-arm phase II | 11                             | Heavily pretreated, chemorefractory CRPC with $\geq$ 5CTCs                                                                                                                                       | Temsirolimus 25 mg weekly i.v.                                                                                                                      | Change in CTCs at 8 weeks: median decline 48%, 3 pts decline to $<$ 5 CTCs/7.5 mL of blood                                             | 1 pt (9%) PSA30, any PSA decline 36.4%; 1 of 8 evaluable pts PR, 4 SD; PFS [excluding PSA] 1.9 months (95% CI 0.9–3.1), OS 8.8 months (3.1–15.6)                                                         | Grade $\geq$ 3 side effects in at least 2 pts: fatigue, muscle weakness, hypokalemia, anemia, hypokalemia                                                                                                                                                                                            | Study stopped prematurely because of lack of efficacy/feasibility                                             |
| Kruczek et al. 2013 [27]     | Open-label, single-arm phase II | 21 (15 evaluable for efficacy) | Chemotherapy-naïve CRPC                                                                                                                                                                          | Temsirolimus 25 mg weekly i.v. (until voluntary withdrawal, objective toxicity, objective progression, or investigator's discretion; 4 week cycles) | Clinical benefit (overall response and SD rate): 13% + 54% = 67%                                                                       | Median time to radiological progression, 2 months (range, 2–10); any PSA decline 28.5%, PSA50 7%, median time to PSA progression 2 months (range, 1–10); median overall survival 13 months (range, 2–37) | Most common grade 3/4 toxicities: thrombocytopenia 33%, lymphopenia 24%, hyperglycemia 24%, fatigue 19%, pneumonia 14%, anemia 14%, hypophosphatemia 14%; 52% of pts with SAEs; no negative impact on QoL (BPI and MDASI scales); 8 pts required dose reductions (5 pts because of thrombocytopenia) | Sponsor halted study early (after accrual of 21 of planned 25 pts); median of 2 cycles of temsirolimus (1–11) |
| Nakabayashi et al. 2012 [28] | Open-label, single-arm phase II | 36                             | CRPC ( $\pm$ 1 line of chemotherapy; previous chemotherapy for HSPC (2 pts), CRPC (3 pts) or both (1 pt); 85% with prior exposure to bicalutamide, of which 69% as second-line hormonal therapy) | Everolimus 10 mg p.o. o.d., and Bicalutamide 50 mg p.o. o.d.                                                                                        | Best overall response (PSA, measurable and bone metastatic disease) as per modified PCWG2 criteria: confirmed PSA responses 6%, SD 25% | TTP 8.7 weeks (range, 0–43.6); unconfirmed PSA30 17%, unconfirmed PSA50 11%                                                                                                                              | Most common grade 3 toxicities: 8% hyperglycemia; 6% fatigue; 6% anemia; 6% hyponatremia; 3% mucositis, rash, cough, creatine phosphokinase elevation and (peri) anal infection                                                                                                                      | Most common type of progression = PSA only progression progression (54%)                                      |
| Templeton et al. 2013 [29]   | Open-label, single-arm phase II | 37                             | Chemotherapy-naïve CRPC                                                                                                                                                                          | Everolimus 10 mg p.o. o.d.                                                                                                                          | PFS at week 12 (PSA, radiographic and/or clinical): 35%                                                                                | PFS 2.8 months (95% CI 1.9–3.6); PSA50 5%, PSA30 16%; numerous translational analyses, including correlation of longer PFS with PTEN deletion ( $p = .07$ )                                              | Grade 3 toxicities in more than 1 pt: 8% anemia, 8% lymphopenia, 5% pain, 5% infection; no grade 4 events                                                                                                                                                                                            | Median duration of treatment 16 weeks (range, 0.3–48); no bone scan progressions at week 12                   |

|                             |                                 |                            |                                                                                      |                                                                                                                                                                               |                                                                                                                                                                              |                                                                                                                    |                                                                                                           |                                                                                                 |
|-----------------------------|---------------------------------|----------------------------|--------------------------------------------------------------------------------------|-------------------------------------------------------------------------------------------------------------------------------------------------------------------------------|------------------------------------------------------------------------------------------------------------------------------------------------------------------------------|--------------------------------------------------------------------------------------------------------------------|-----------------------------------------------------------------------------------------------------------|-------------------------------------------------------------------------------------------------|
| Amato et al. 2012 [30]      | Open-label, single-arm phase II | 38                         | Progressive taxane-treated CRPC                                                      | Ridaforolimus 50 mg weekly i.v.                                                                                                                                               | RECIST1.0: PR 0%, SD 47.4%                                                                                                                                                   | PFS 28 days; PSA SD 21.1%, no PSA50; median time on treatment 109.5 days (1–442)                                   | “generally well tolerated”; 6 pts discontinued treatment because of treatment-related AEs                 | PSA-alone progressors allowed to continue treatment; 14 pts not assessable for primary endpoint |
| Meulenbeld et al. 2013 [31] | Open-label safety lead-in trial | 11 (plus 1 screen failure) | Chemotherapy-naïve CRPC, without antiandrogen use within the last 4 weeks            | Ridaforolimus 30 mg p.o. day 1, then 5/7 days starting day 8, and Bicalutamide 50 mg p.o. o.d. starting day 2                                                                 | Safety and tolerability: 36.4% at least one grade $\geq 3$ treatment-emergent AE, 72% of planned dose of ridaforolimus                                                       | PK analysis: ridaforolimus levels similar before versus after bicalutamide comedication; PSA50 27%, PSA30 36%      | See primary endpoint                                                                                      | Study terminated after safety lead-in because of 3 pts with DLTs                                |
| Armstrong et al. 2010 [32]  | Phase I                         | 32                         | Men with intermediate- to high-risk prostate cancer undergoing radical prostatectomy | Rapamycin 3 mg p.o. o.d. $\times$ 14 days ( $n = 20$ ), or 6 mg p.o. o.d. $\times$ 14 days ( $n = 2$ ) before prostatectomy; control ( $n = 10$ ) receiving 3 mg of rapamycin | Inhibition of S6 phosphorylation in pretreatment biopsy vs. prostatectomy samples: median inhibition of 58% in 50% of evaluable pts ( $n = 10$ ) receiving 3 mg of rapamycin | PSA decline 27% (3 mg cohort), not further specified; no relevant effects on tumor cell proliferation or apoptosis | 3 mg cohort no grade $\geq 3$ side effects; DLT in both pts of 6 mg cohort - thrombocytopenia, stomatitis |                                                                                                 |

Abbreviations: CRPC, castration-resistant prostate cancer; 95% CI, 95% confidence interval; CTC, circulating tumor cell; DLT, dose-limiting toxicity; HSPC, hormone-sensitive prostate cancer; OS, overall survival; PCWG2, Prostate Cancer Working Group 2; PFS, progression-free survival; PK, pharmacokinetic; PR, partial response; pt(s), patient(s); PSA, prostate specific antigen; PSA30,  $\geq 30\%$  PSA response; PSA50,  $\geq 50\%$  PSA response; PTEN, phosphatase and tensin homolog; QoL, quality of life; RECIST, Response Evaluation Criteria In Solid Tumors; (S)AE, (serious) adverse event; SD, stable disease; TTP, time to tumor progression.

[Click here](#) to access other published clinical trials.
